# Supplementary material
Source: Springer Nature journal article supplement (https://www.springermedizin.de/resource/supplementary/12874_2004_74_MOESM1_ESM.pdf/9433710)
Supplement: MOESM1 [file 9433710]

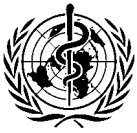

REPORT IDENTIFICATION NO.:  /

A15060SCR01

SCREENING CODE:

*This form will be read by an electronic scanner. Please write clearly and carefully, ensuring that no writing touches or crosses over boxes. DO NOT FOLD, STAPLE OR PERFORATE.*

SCREENING QUESTIONS

No Yes

- 1. Does the report include data on maternal mortality and/or morbidity?
- 2. Does the report specify dates for data collection?
- 3. Does the report refer to data collected only before 1990?
- 4. If the report refers to data collected before 1990, and disaggregation of data by year is not possible, are data before 1980 included or is it unclear?
- 5. Is the number of study subjects less than 200?
- 6. Is the study in a case-control design?

*(NOTE: If any answer falls into a circle, that study will be excluded.)*

ASSESSMENT

No Yes

- 7. Excluded following initial screening (Titles/Abstracts)
- 8. Excluded following full text screening
- 9. If the answers to Questions "7" or "8" is "Yes", please indicate the reason for exclusion:
- 10. If other, specify \_\_\_\_\_

WHO CODE

Reviewer: \_\_\_\_\_

Date: \_\_\_\_\_

Signature \_\_\_\_\_

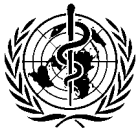

REPORT IDENTIFICATION NO.:

□□□□□□ / □□

A15060MD101

**THIS FORM WILL BE READ BY AN ELECTRONIC SCANNER. PLEASE WRITE CLEARLY AND CAREFULLY, ENSURING THAT NO WRITING TOUCHES OR CROSSES OVER BOXES. DO NOT FOLD, STAPLE OR PERFORATE.**

GENERAL INFORMATION

1. Country and area coding (SALB) □□□□□□□□□□

1a. Region / area \_\_\_\_\_

2. Study period 

| Month | Year |
|-------|------|
| □□    | □□   |

 to 

| Month | Year |
|-------|------|
| □□    | □□   |

CHARACTERISTICS OF THE STUDY

3. Study design   
(1) Census  
(2) Cross-sectional  
(3) Cohort/longitudinal  
(4) Controlled trial  
(5) Incidence/Prevalence survey  
(6) Unknown  
(7) Other, specify \_\_\_\_\_  WHO CODE

4. Sampling   
(1) Random sample  
4a. Specify the method of randomization: \_\_\_\_\_  WHO CODE  
(2) Non-random sample  
4b. Specify the method of sampling: \_\_\_\_\_  WHO CODE

(3) Total population (i.e. census)  
(4) Unknown

5. Data source   
(1) Vital statistics/census  
(2) Medical record  
(3) Special survey/interview  
(4) Multiple sources  
(5) Clinical data collected for the study  
(6) Other, specify \_\_\_\_\_  WHO CODE

6. Lowest unit of data source   
(1) Cluster  
6a. Number of clusters   
(2) Individual  
(3) Other, specify \_\_\_\_\_  WHO CODE

7. Number of eligible subjects (if available) □□□□□□□□□□

8. Sample size studied □□□□□□□□□□

9. Population studied   
(1) Urban  
(2) Rural  
(3) Mixed  
(4) Unknown

10. Description of the characteristics of the population studied (e.g. socio-economic status, ethnic group, age group, etc.)  WHO CODE  
\_\_\_\_\_

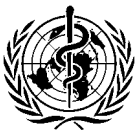

REPORT IDENTIFICATION NO.:

□ □ □ □ □ / □ □

A15060MD102

**CHARACTERISTICS OF THE STUDY (cont.)**

11. Description of the health characteristics of the population (e.g. healthy women, women with a specific condition, etc.) □ □ □  
WHO CODE

---

12. Is there information regarding the proportion of subjects lost to follow-up (or non-responders or those not included in the analysis)? Yes No NA  
□ □ □

13. If "Yes", percentage of the study subjects lost to follow-up (or non-responders or those not included in the analysis) □ □

14. Have the characteristics of the study subjects lost to follow-up (or non-responders or those not included in the analysis) been described? Yes No NA  
□ □ □

15. If "Yes", are the characteristics of the study subjects lost to follow-up (or non-responders or those not included in the analysis) different from the rest of the population? Yes No NA  
□ □ □

16. Place studied □

(1) National  
(2) Province/region  
(3) City  
(4) Medical facility  
(5) Other, specify \_\_\_\_\_ □ □  
WHO CODE

17. Description of the characteristics of the study setting □ □ □  
WHO CODE

---

18. Place of delivery/abortion □

(1) Home  
(2) Hospital  
(3) Mixed  
(4) Unknown  
(5) Not applicable (i.e. only during pregnancy)  
(6) Other, specify \_\_\_\_\_ □ □  
WHO CODE

19. If applicable, description of intervention □ □ □  
WHO CODE

---

20. Forms of reporting data □

(1) Crude  
(2) Adjusted for confounding variables  
(3) Crude and adjusted  
(4) Standardised by population distribution  
(5) Adjusted and standardised

21. Are there data regarding risk factors? Yes No  
□ □

**REMARKS FOR THE CHARACTERISTICS OF THE STUDY**

22.

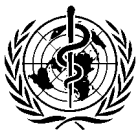

REPORT IDENTIFICATION NO.:

□□□□□ / □□

A15060MD201

MATERNAL MORBIDITY

23. Prevalence / incidence

|            | (i)      | (ii)         | (iii)       | (iv)* | (v)        | (vi)** |
|------------|----------|--------------|-------------|-------|------------|--------|
| Condition  | WHO code | No. of cases | Denominator | Type  | Percentage | Timing |
| 23a) _____ | □□□      | □□□□         | □□□□□□□□    | □     | □□□□.□     | □      |
| 23b) _____ | □□□      | □□□□         | □□□□□□□□    | □     | □□□□.□     | □      |
| 23c) _____ | □□□      | □□□□         | □□□□□□□□    | □     | □□□□.□     | □      |
| 23d) _____ | □□□      | □□□□         | □□□□□□□□    | □     | □□□□.□     | □      |
| 23e) _____ | □□□      | □□□□         | □□□□□□□□    | □     | □□□□.□     | □      |
| 23f) _____ | □□□      | □□□□         | □□□□□□□□    | □     | □□□□.□     | □      |
| 23g) _____ | □□□      | □□□□         | □□□□□□□□    | □     | □□□□.□     | □      |
| 23h) _____ | □□□      | □□□□         | □□□□□□□□    | □     | □□□□.□     | □      |
| 23i) _____ | □□□      | □□□□         | □□□□□□□□    | □     | □□□□.□     | □      |
| 23j) _____ | □□□      | □□□□         | □□□□□□□□    | □     | □□□□.□     | □      |
| 23k) _____ | □□□      | □□□□         | □□□□□□□□    | □     | □□□□.□     | □      |
| 23l) _____ | □□□      | □□□□         | □□□□□□□□    | □     | □□□□.□     | □      |

\*WHO CODE: 1. Live births  
 2. Pregnancies  
 3. Deliveries  
 4. Women

\*\*Timing of diagnosis -WHO CODE:  
 1. Ante-partum 4. More than one of the above  
 2. During delivery 5. Not specified  
 3. Post-partum

REMARKS FOR MATERNAL MORBIDITY

24.

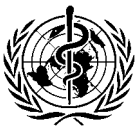

REPORT IDENTIFICATION NO.:

|  |  |  |  |  |   |  |  |
|--|--|--|--|--|---|--|--|
|  |  |  |  |  | / |  |  |
|--|--|--|--|--|---|--|--|

A15060MD301

MATERNAL MORTALITY

25a. Maternal mortality estimates

i) Year

| From | To |
|------|----|
|      |    |

ii) Age group

| From | To |
|------|----|
|      |    |

iii) No. of deaths

|  |  |  |  |
|--|--|--|--|
|  |  |  |  |
|--|--|--|--|

iv) 

| Denominator |  |  |  |  |  |  |  |
|-------------|--|--|--|--|--|--|--|
|             |  |  |  |  |  |  |  |

 v) 

|                |  |
|----------------|--|
| 1. Live births |  |
| 2. Pregnancies |  |
| 3. Deliveries  |  |

vi) 

| MM Rate |  |  |  |
|---------|--|--|--|
|         |  |  |  |

 vii) 

| CI (95%) |  |  |  |
|----------|--|--|--|
|          |  |  |  |

 - 

| CI (95%) |  |  |  |
|----------|--|--|--|
|          |  |  |  |

viii) 

| MM Ratio |  |  |  |
|----------|--|--|--|
|          |  |  |  |

 ix) 

| CI (95%) |  |  |  |
|----------|--|--|--|
|          |  |  |  |

 - 

| CI (95%) |  |  |  |
|----------|--|--|--|
|          |  |  |  |

25c. Maternal mortality estimates

i) Year

| From | To |
|------|----|
|      |    |

ii) Age group

| From | To |
|------|----|
|      |    |

iii) No. of deaths

|  |  |  |  |
|--|--|--|--|
|  |  |  |  |
|--|--|--|--|

iv) 

| Denominator |  |  |  |  |  |  |  |
|-------------|--|--|--|--|--|--|--|
|             |  |  |  |  |  |  |  |

 v) 

|                |  |
|----------------|--|
| 1. Live births |  |
| 2. Pregnancies |  |
| 3. Deliveries  |  |

vi) 

| MM Rate |  |  |  |
|---------|--|--|--|
|         |  |  |  |

 vii) 

| CI (95%) |  |  |  |
|----------|--|--|--|
|          |  |  |  |

 - 

| CI (95%) |  |  |  |
|----------|--|--|--|
|          |  |  |  |

viii) 

| MM Ratio |  |  |  |
|----------|--|--|--|
|          |  |  |  |

 ix) 

| CI (95%) |  |  |  |
|----------|--|--|--|
|          |  |  |  |

 - 

| CI (95%) |  |  |  |
|----------|--|--|--|
|          |  |  |  |

25b. Maternal mortality estimates

i) Year

| From | To |
|------|----|
|      |    |

ii) Age group

| From | To |
|------|----|
|      |    |

iii) No. of deaths

|  |  |  |  |
|--|--|--|--|
|  |  |  |  |
|--|--|--|--|

iv) 

| Denominator |  |  |  |  |  |  |  |
|-------------|--|--|--|--|--|--|--|
|             |  |  |  |  |  |  |  |

 v) 

|                |  |
|----------------|--|
| 1. Live births |  |
| 2. Pregnancies |  |
| 3. Deliveries  |  |

vi) 

| MM Rate |  |  |  |
|---------|--|--|--|
|         |  |  |  |

 vii) 

| CI (95%) |  |  |  |
|----------|--|--|--|
|          |  |  |  |

 - 

| CI (95%) |  |  |  |
|----------|--|--|--|
|          |  |  |  |

viii) 

| MM Ratio |  |  |  |
|----------|--|--|--|
|          |  |  |  |

 ix) 

| CI (95%) |  |  |  |
|----------|--|--|--|
|          |  |  |  |

 - 

| CI (95%) |  |  |  |
|----------|--|--|--|
|          |  |  |  |

25d. Maternal mortality estimates

i) Year

| From | To |
|------|----|
|      |    |

ii) Age group

| From | To |
|------|----|
|      |    |

iii) No. of deaths

|  |  |  |  |
|--|--|--|--|
|  |  |  |  |
|--|--|--|--|

iv) 

| Denominator |  |  |  |  |  |  |  |
|-------------|--|--|--|--|--|--|--|
|             |  |  |  |  |  |  |  |

 v) 

|                |  |
|----------------|--|
| 1. Live births |  |
| 2. Pregnancies |  |
| 3. Deliveries  |  |

vi) 

| MM Rate |  |  |  |
|---------|--|--|--|
|         |  |  |  |

 vii) 

| CI (95%) |  |  |  |
|----------|--|--|--|
|          |  |  |  |

 - 

| CI (95%) |  |  |  |
|----------|--|--|--|
|          |  |  |  |

viii) 

| MM Ratio |  |  |  |
|----------|--|--|--|
|          |  |  |  |

 ix) 

| CI (95%) |  |  |  |
|----------|--|--|--|
|          |  |  |  |

 - 

| CI (95%) |  |  |  |
|----------|--|--|--|
|          |  |  |  |

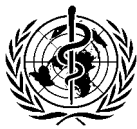

REPORT IDENTIFICATION NO.:

/

A15060MD302

MATERNAL MORTALITY (cont.)

26a. Cause distribution of maternal mortality

| Condition    | (i)<br>WHO code                                                | (ii)<br>No. of deaths                                                               | (iii)<br>Percentage                                                                   |
|--------------|----------------------------------------------------------------|-------------------------------------------------------------------------------------|---------------------------------------------------------------------------------------|
| 26a.1) _____ | <input type="text"/> <input type="text"/> <input type="text"/> | <input type="text"/> <input type="text"/> <input type="text"/> <input type="text"/> | <input type="text"/> <input type="text"/> . <input type="text"/> <input type="text"/> |
| 26a.2) _____ | <input type="text"/> <input type="text"/> <input type="text"/> | <input type="text"/> <input type="text"/> <input type="text"/> <input type="text"/> | <input type="text"/> <input type="text"/> . <input type="text"/> <input type="text"/> |
| 26a.3) _____ | <input type="text"/> <input type="text"/> <input type="text"/> | <input type="text"/> <input type="text"/> <input type="text"/> <input type="text"/> | <input type="text"/> <input type="text"/> . <input type="text"/> <input type="text"/> |
| 26a.4) _____ | <input type="text"/> <input type="text"/> <input type="text"/> | <input type="text"/> <input type="text"/> <input type="text"/> <input type="text"/> | <input type="text"/> <input type="text"/> . <input type="text"/> <input type="text"/> |
| 26a.5) _____ | <input type="text"/> <input type="text"/> <input type="text"/> | <input type="text"/> <input type="text"/> <input type="text"/> <input type="text"/> | <input type="text"/> <input type="text"/> . <input type="text"/> <input type="text"/> |
| 26a.6) _____ | <input type="text"/> <input type="text"/> <input type="text"/> | <input type="text"/> <input type="text"/> <input type="text"/> <input type="text"/> | <input type="text"/> <input type="text"/> . <input type="text"/> <input type="text"/> |
| 26a.7) _____ | <input type="text"/> <input type="text"/> <input type="text"/> | <input type="text"/> <input type="text"/> <input type="text"/> <input type="text"/> | <input type="text"/> <input type="text"/> . <input type="text"/> <input type="text"/> |

MATERNAL MORTALITY (cont.)

27a. Case-fatality rates

| Condition    | (i)<br>WHO code                                                | (ii)<br>No. of cases                                                                | (iii)<br>Denominator                                                                                                          | (iv)<br>Percentage                                                                    |
|--------------|----------------------------------------------------------------|-------------------------------------------------------------------------------------|-------------------------------------------------------------------------------------------------------------------------------|---------------------------------------------------------------------------------------|
| 27a.1) _____ | <input type="text"/> <input type="text"/> <input type="text"/> | <input type="text"/> <input type="text"/> <input type="text"/> <input type="text"/> | <input type="text"/> <input type="text"/> <input type="text"/> <input type="text"/> <input type="text"/> <input type="text"/> | <input type="text"/> <input type="text"/> . <input type="text"/> <input type="text"/> |
| 27a.2) _____ | <input type="text"/> <input type="text"/> <input type="text"/> | <input type="text"/> <input type="text"/> <input type="text"/> <input type="text"/> | <input type="text"/> <input type="text"/> <input type="text"/> <input type="text"/> <input type="text"/> <input type="text"/> | <input type="text"/> <input type="text"/> . <input type="text"/> <input type="text"/> |
| 27a.3) _____ | <input type="text"/> <input type="text"/> <input type="text"/> | <input type="text"/> <input type="text"/> <input type="text"/> <input type="text"/> | <input type="text"/> <input type="text"/> <input type="text"/> <input type="text"/> <input type="text"/> <input type="text"/> | <input type="text"/> <input type="text"/> . <input type="text"/> <input type="text"/> |
| 27a.4) _____ | <input type="text"/> <input type="text"/> <input type="text"/> | <input type="text"/> <input type="text"/> <input type="text"/> <input type="text"/> | <input type="text"/> <input type="text"/> <input type="text"/> <input type="text"/> <input type="text"/> <input type="text"/> | <input type="text"/> <input type="text"/> . <input type="text"/> <input type="text"/> |
| 27a.5) _____ | <input type="text"/> <input type="text"/> <input type="text"/> | <input type="text"/> <input type="text"/> <input type="text"/> <input type="text"/> | <input type="text"/> <input type="text"/> <input type="text"/> <input type="text"/> <input type="text"/> <input type="text"/> | <input type="text"/> <input type="text"/> . <input type="text"/> <input type="text"/> |
| 27a.6) _____ | <input type="text"/> <input type="text"/> <input type="text"/> | <input type="text"/> <input type="text"/> <input type="text"/> <input type="text"/> | <input type="text"/> <input type="text"/> <input type="text"/> <input type="text"/> <input type="text"/> <input type="text"/> | <input type="text"/> <input type="text"/> . <input type="text"/> <input type="text"/> |
| 27a.7) _____ | <input type="text"/> <input type="text"/> <input type="text"/> | <input type="text"/> <input type="text"/> <input type="text"/> <input type="text"/> | <input type="text"/> <input type="text"/> <input type="text"/> <input type="text"/> <input type="text"/> <input type="text"/> | <input type="text"/> <input type="text"/> . <input type="text"/> <input type="text"/> |

REMARKS FOR MATERNAL MORTALITY

28a.

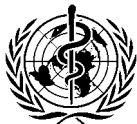

REPORT IDENTIFICATION NO.:

|  |  |  |  |  |   |  |  |
|--|--|--|--|--|---|--|--|
|  |  |  |  |  | / |  |  |
|--|--|--|--|--|---|--|--|

A15060MD303

MATERNAL MORTALITY (cont.)

26b. Cause distribution of maternal mortality

| Condition    | (i)<br>WHO code                                                | (ii)<br>No. of deaths                                                               | (iii)<br>Percentage                                                                   |
|--------------|----------------------------------------------------------------|-------------------------------------------------------------------------------------|---------------------------------------------------------------------------------------|
| 26b.1) _____ | <input type="text"/> <input type="text"/> <input type="text"/> | <input type="text"/> <input type="text"/> <input type="text"/> <input type="text"/> | <input type="text"/> <input type="text"/> . <input type="text"/> <input type="text"/> |
| 26b.2) _____ | <input type="text"/> <input type="text"/> <input type="text"/> | <input type="text"/> <input type="text"/> <input type="text"/> <input type="text"/> | <input type="text"/> <input type="text"/> . <input type="text"/> <input type="text"/> |
| 26b.3) _____ | <input type="text"/> <input type="text"/> <input type="text"/> | <input type="text"/> <input type="text"/> <input type="text"/> <input type="text"/> | <input type="text"/> <input type="text"/> . <input type="text"/> <input type="text"/> |
| 26b.4) _____ | <input type="text"/> <input type="text"/> <input type="text"/> | <input type="text"/> <input type="text"/> <input type="text"/> <input type="text"/> | <input type="text"/> <input type="text"/> . <input type="text"/> <input type="text"/> |
| 26b.5) _____ | <input type="text"/> <input type="text"/> <input type="text"/> | <input type="text"/> <input type="text"/> <input type="text"/> <input type="text"/> | <input type="text"/> <input type="text"/> . <input type="text"/> <input type="text"/> |
| 26b.6) _____ | <input type="text"/> <input type="text"/> <input type="text"/> | <input type="text"/> <input type="text"/> <input type="text"/> <input type="text"/> | <input type="text"/> <input type="text"/> . <input type="text"/> <input type="text"/> |
| 26b.7) _____ | <input type="text"/> <input type="text"/> <input type="text"/> | <input type="text"/> <input type="text"/> <input type="text"/> <input type="text"/> | <input type="text"/> <input type="text"/> . <input type="text"/> <input type="text"/> |

MATERNAL MORTALITY (cont.)

27b. Case-fatality rates

| Condition    | (i)<br>WHO code                                                | (ii)<br>No. of cases                                                                | (iii)<br>Denominator                                                                                                          | (iv)<br>Percentage                                                                    |
|--------------|----------------------------------------------------------------|-------------------------------------------------------------------------------------|-------------------------------------------------------------------------------------------------------------------------------|---------------------------------------------------------------------------------------|
| 27b.1) _____ | <input type="text"/> <input type="text"/> <input type="text"/> | <input type="text"/> <input type="text"/> <input type="text"/> <input type="text"/> | <input type="text"/> <input type="text"/> <input type="text"/> <input type="text"/> <input type="text"/> <input type="text"/> | <input type="text"/> <input type="text"/> . <input type="text"/> <input type="text"/> |
| 27b.2) _____ | <input type="text"/> <input type="text"/> <input type="text"/> | <input type="text"/> <input type="text"/> <input type="text"/> <input type="text"/> | <input type="text"/> <input type="text"/> <input type="text"/> <input type="text"/> <input type="text"/> <input type="text"/> | <input type="text"/> <input type="text"/> . <input type="text"/> <input type="text"/> |
| 27b.3) _____ | <input type="text"/> <input type="text"/> <input type="text"/> | <input type="text"/> <input type="text"/> <input type="text"/> <input type="text"/> | <input type="text"/> <input type="text"/> <input type="text"/> <input type="text"/> <input type="text"/> <input type="text"/> | <input type="text"/> <input type="text"/> . <input type="text"/> <input type="text"/> |
| 27b.4) _____ | <input type="text"/> <input type="text"/> <input type="text"/> | <input type="text"/> <input type="text"/> <input type="text"/> <input type="text"/> | <input type="text"/> <input type="text"/> <input type="text"/> <input type="text"/> <input type="text"/> <input type="text"/> | <input type="text"/> <input type="text"/> . <input type="text"/> <input type="text"/> |
| 27b.5) _____ | <input type="text"/> <input type="text"/> <input type="text"/> | <input type="text"/> <input type="text"/> <input type="text"/> <input type="text"/> | <input type="text"/> <input type="text"/> <input type="text"/> <input type="text"/> <input type="text"/> <input type="text"/> | <input type="text"/> <input type="text"/> . <input type="text"/> <input type="text"/> |
| 27b.6) _____ | <input type="text"/> <input type="text"/> <input type="text"/> | <input type="text"/> <input type="text"/> <input type="text"/> <input type="text"/> | <input type="text"/> <input type="text"/> <input type="text"/> <input type="text"/> <input type="text"/> <input type="text"/> | <input type="text"/> <input type="text"/> . <input type="text"/> <input type="text"/> |
| 27b.7) _____ | <input type="text"/> <input type="text"/> <input type="text"/> | <input type="text"/> <input type="text"/> <input type="text"/> <input type="text"/> | <input type="text"/> <input type="text"/> <input type="text"/> <input type="text"/> <input type="text"/> <input type="text"/> | <input type="text"/> <input type="text"/> . <input type="text"/> <input type="text"/> |

REMARKS FOR MATERNAL MORTALITY

28b.

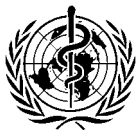

REPORT IDENTIFICATION NO.:

□□□□□ / □□

A15060MD304

MATERNAL MORTALITY (cont.)

26c. Cause distribution of maternal mortality

| Condition    | (i)<br>WHO code | (ii)<br>No. of deaths | (iii)<br>Percentage |
|--------------|-----------------|-----------------------|---------------------|
| 26c.1) _____ | □□□             | □□□□                  | □□.□                |
| 26c.2) _____ | □□□             | □□□□                  | □□.□                |
| 26c.3) _____ | □□□             | □□□□                  | □□.□                |
| 26c.4) _____ | □□□             | □□□□                  | □□.□                |
| 26c.5) _____ | □□□             | □□□□                  | □□.□                |
| 26c.6) _____ | □□□             | □□□□                  | □□.□                |
| 26c.7) _____ | □□□             | □□□□                  | □□.□                |

MATERNAL MORTALITY (cont.)

27c. Case-fatality rates

| Condition    | (i)<br>WHO code | (ii)<br>No. of cases | (iii)<br>Denominator | (iv)<br>Percentage |
|--------------|-----------------|----------------------|----------------------|--------------------|
| 27c.1) _____ | □□□             | □□□□                 | □□□□□□               | □□.□□              |
| 27c.2) _____ | □□□             | □□□□                 | □□□□□□               | □□.□□              |
| 27c.3) _____ | □□□             | □□□□                 | □□□□□□               | □□.□□              |
| 27c.4) _____ | □□□             | □□□□                 | □□□□□□               | □□.□□              |
| 27c.5) _____ | □□□             | □□□□                 | □□□□□□               | □□.□□              |
| 27c.6) _____ | □□□             | □□□□                 | □□□□□□               | □□.□□              |
| 27c.7) _____ | □□□             | □□□□                 | □□□□□□               | □□.□□              |

REMARKS FOR MATERNAL MORTALITY

28c.





REPORT IDENTIFICATION NO.:

□□□□□ / □□

A15060MD305

MATERNAL MORTALITY (cont.)

26d. Cause distribution of maternal mortality

| Condition    | (i)<br>WHO code | (ii)<br>No. of deaths | (iii)<br>Percentage |
|--------------|-----------------|-----------------------|---------------------|
| 26d.1) _____ | □□□             | □□□□                  | □□.□                |
| 26d.2) _____ | □□□             | □□□□                  | □□.□                |
| 26d.3) _____ | □□□             | □□□□                  | □□.□                |
| 26d.4) _____ | □□□             | □□□□                  | □□.□                |
| 26d.5) _____ | □□□             | □□□□                  | □□.□                |
| 26d.6) _____ | □□□             | □□□□                  | □□.□                |
| 26d.7) _____ | □□□             | □□□□                  | □□.□                |

MATERNAL MORTALITY (cont.)

27d. Case-fatality rates

| Condition    | (i)<br>WHO code | (ii)<br>No. of cases | (iii)<br>Denominator | (iv)<br>Percentage |
|--------------|-----------------|----------------------|----------------------|--------------------|
| 27d.1) _____ | □□□             | □□□□                 | □□□□□□               | □□.□□              |
| 27d.2) _____ | □□□             | □□□□                 | □□□□□□               | □□.□□              |
| 27d.3) _____ | □□□             | □□□□                 | □□□□□□               | □□.□□              |
| 27d.4) _____ | □□□             | □□□□                 | □□□□□□               | □□.□□              |
| 27d.5) _____ | □□□             | □□□□                 | □□□□□□               | □□.□□              |
| 27d.6) _____ | □□□             | □□□□                 | □□□□□□               | □□.□□              |
| 27d.7) _____ | □□□             | □□□□                 | □□□□□□               | □□.□□              |

REMARKS FOR MATERNAL MORTALITY

28d.

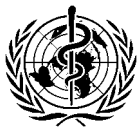

REPORT IDENTIFICATION NO.:      /

A15060MD401

DATA QUALITY ASSESSMENT

29. Haemorrhage

29a) Does the study include a definition?  Yes  No

29b) If definition is included, please specify:    WHO code

29c) Does the study explain the method of assessment of blood loss?  Yes  No

29d) If method of assessment is explained, please specify:    WHO code

REMARKS

29e)

REMARKS

30k)

30. Hypertensive disorders in pregnancy (HDP)

30a) Is pre-eclampsia reported?  Yes  No

30b) If a definition for pre-eclampsia is included, please specify    WHO code

30c) Is eclampsia reported?  Yes  No

30d) If a definition for eclampsia is included, please specify    WHO code

30e) Is pregnancy-induced (gestational) hypertension reported?  Yes  No

30f) If a definition for pregnancy-induced (gestational) hypertension is included, please specify    WHO code

30g) Is chronic hypertension reported?  Yes  No

30h) If a definition for chronic hypertension is included, please specify    WHO code

30i) Is the diagnostic procedure for HDP described?  Yes  No

30j) If the diagnostic procedure is described, please specify:    WHO code



REPORT IDENTIFICATION NO.:

□□□□□ / □□

A15060MD402

DATA QUALITY DEFINITIONS

31. Abortion/complications of abortion

31a) Type of abortion/complications of abortion

WHO code

□□□

Yes No

31b) Does the study include a definition?

□ □

31c) If definition is included, please specify:

□□□

WHO code

Yes No

31d) Does the study state the gestational age from which they considered the abortion?

□ □

31e) If yes, please specify:

□□□

WHO code

31f) If applicable, characteristics of abortion (mark as many types as necessary)

(1) Legal

(4) Unsafe

(2) Illegal

(5) Mixed/All

(3) Safe

(6) NR/NS

Yes No

31g) Does the study explain the diagnostic procedure?

□ □

31h) If diagnostic procedure is explained, please specify:

□□□

WHO code

REMARKS

31i)

32. Infections

WHO code

32a) Condition \_\_\_\_\_

□□□

Yes No

32b) Does the study include a definition?

□ □

32c) If definition is included, please specify:

□□□

WHO code

Yes No

32d) Does the study explain the method of assessment of the infection?

□ □

32e) If method of assessment is explained, please specify:

□□□

WHO code

REMARKS

32f)

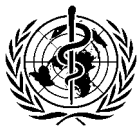

REPORT IDENTIFICATION NO.:

/

A15060MD403

33. Infections

WHO code

33a) Condition \_\_\_\_\_

Yes No

33b) Does the study include a definition?

33c) If definition is included, please specify:

WHO code

\_\_\_\_\_

\_\_\_\_\_

Yes No

33d) Does the study explain the method of assessment of the infection?

33e) If method of assessment is explained, please specify:

WHO code

\_\_\_\_\_

\_\_\_\_\_

34. Infections

WHO code

34a) Condition \_\_\_\_\_

Yes No

34b) Does the study include a definition?

34c) If definition is included, please specify:

WHO code

\_\_\_\_\_

\_\_\_\_\_

Yes No

34d) Does the study explain the method of assessment of the infection?

34e) If method of assessment is explained, please specify:

WHO code

\_\_\_\_\_

\_\_\_\_\_

REMARKS

33f)

REMARKS

34f)



REPORT IDENTIFICATION NO.:

□□□□□ / □□

A15060MD404

DATA QUALITY DEFINITIONS

35. Anaemia

35a) Does the study include a definition? Yes No

35b) If definition is included, please specify:   
WHO code

35c) Specify if the women in the study are:   
1. Not having routine iron/folate supplements  
2. Having iron/folate supplements  
3. Some are having/some not  
4. Not specified

35d) What period of pregnancy are data referring to:   
1. 1st trimester  
2. 2nd trimester  
3. 3rd trimester  
4. More than one of the above  
5. All trimesters  
6. Post-partum  
7. Not specified

35e) Does the study describe the diagnostic procedure? Yes No

35f) If diagnostic procedure is described, please specify:   
WHO code

REMARKS

35g)

36. Other conditions

36a) Type of condition  
\_\_\_\_\_  
WHO code

36b) Does the study include a definition of the condition? Yes No

36c) If definition is included, please specify:   
WHO code  
\_\_\_\_\_  
\_\_\_\_\_

36d) Does the study describe the diagnostic procedure? Yes No

36e) If diagnostic procedure is described, please specify:   
WHO code  
\_\_\_\_\_  
\_\_\_\_\_

REMARKS

36f)



REPORT IDENTIFICATION NO.:

□□□□□ / □□

A15060MD405

DATA QUALITY DEFINITIONS

37. Other conditions

37a) Type of condition

\_\_\_\_\_

WHO code

□□□

37b) Does the study include a definition of the condition?

Yes  No

37c) If definition is included, please specify:

\_\_\_\_\_  
\_\_\_\_\_

WHO code

□□□

37d) Does the study describe the diagnostic procedure?

Yes  No

37e) If diagnostic procedure is described, please specify:

\_\_\_\_\_  
\_\_\_\_\_

WHO code

□□□

38. Other conditions

38a) Type of condition

\_\_\_\_\_

WHO code

□□□

38b) Does the study include a definition of the condition?

Yes  No

38c) If definition is included, please specify:

\_\_\_\_\_  
\_\_\_\_\_

WHO code

□□□

38d) Does the study describe the diagnostic procedure?

Yes  No

38e) If diagnostic procedure is described, please specify:

\_\_\_\_\_  
\_\_\_\_\_

WHO code

□□□

REMARKS

37f)

REMARKS

38f)



REPORT IDENTIFICATION NO.:

□□□□□ / □□

A15060MD406

DATA QUALITY DEFINITIONS (con't.)

39. Other conditions

39a) Type of condition

\_\_\_\_\_ WHO code  
□□□

39b) Does the study include a definition of the condition?

Yes No

39c) If definition is included, please specify:

\_\_\_\_\_ WHO code  
□□□

39d) Does the study describe the diagnostic procedure?

Yes No

39e) If diagnostic procedure is described, please specify:

\_\_\_\_\_ WHO code  
□□□

REMARKS

39f)

40. Other conditions

40a) Type of condition

\_\_\_\_\_ WHO code  
□□□

40b) Does the study include a definition of the condition?

Yes No

40c) If definition is included, please specify:

\_\_\_\_\_ WHO code  
□□□

40d) Does the study describe the diagnostic procedure?

Yes No

40e) If diagnostic procedure is described, please specify:

\_\_\_\_\_ WHO code  
□□□

REMARKS

40f)

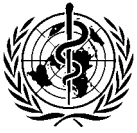

REPORT IDENTIFICATION NO.:  /

A15060MD501

DATA QUALITY ASSESSMENT

REMARKS FOR DATA QUALITY ASSESSMENT

41. Data reported

(1) Estimates

(2) Actual counts

(3) Other, specify \_\_\_\_\_

WHO CODE

42. Is a definition of maternal death included? Yes  No

43. If yes, which definition?

(1) ICD-10 up to 42 days after delivery

(2) ICD-10 up to 1 year after delivery

(3) DHS up to 42 days regardless cause of death

(4) Other, specify

\_\_\_\_\_   
WHO CODE

44. Are the deaths confirmed as maternal? Yes  No  NR/NS

45. If yes, please specify:

(1) Confidential enquiry

(2) Verbal autopsy

(3) Unknown

(4) Other, specify

\_\_\_\_\_   
WHO CODE

46. Is any special effort to capture all maternal deaths in the study population reported? Yes  No  NR/NS

47. If yes, please specify

WHO CODE

48.
